# Supplementary material
Source: ML conference proceedings conference paper supplement (https://aclanthology.org/2021.findings-acl.362)

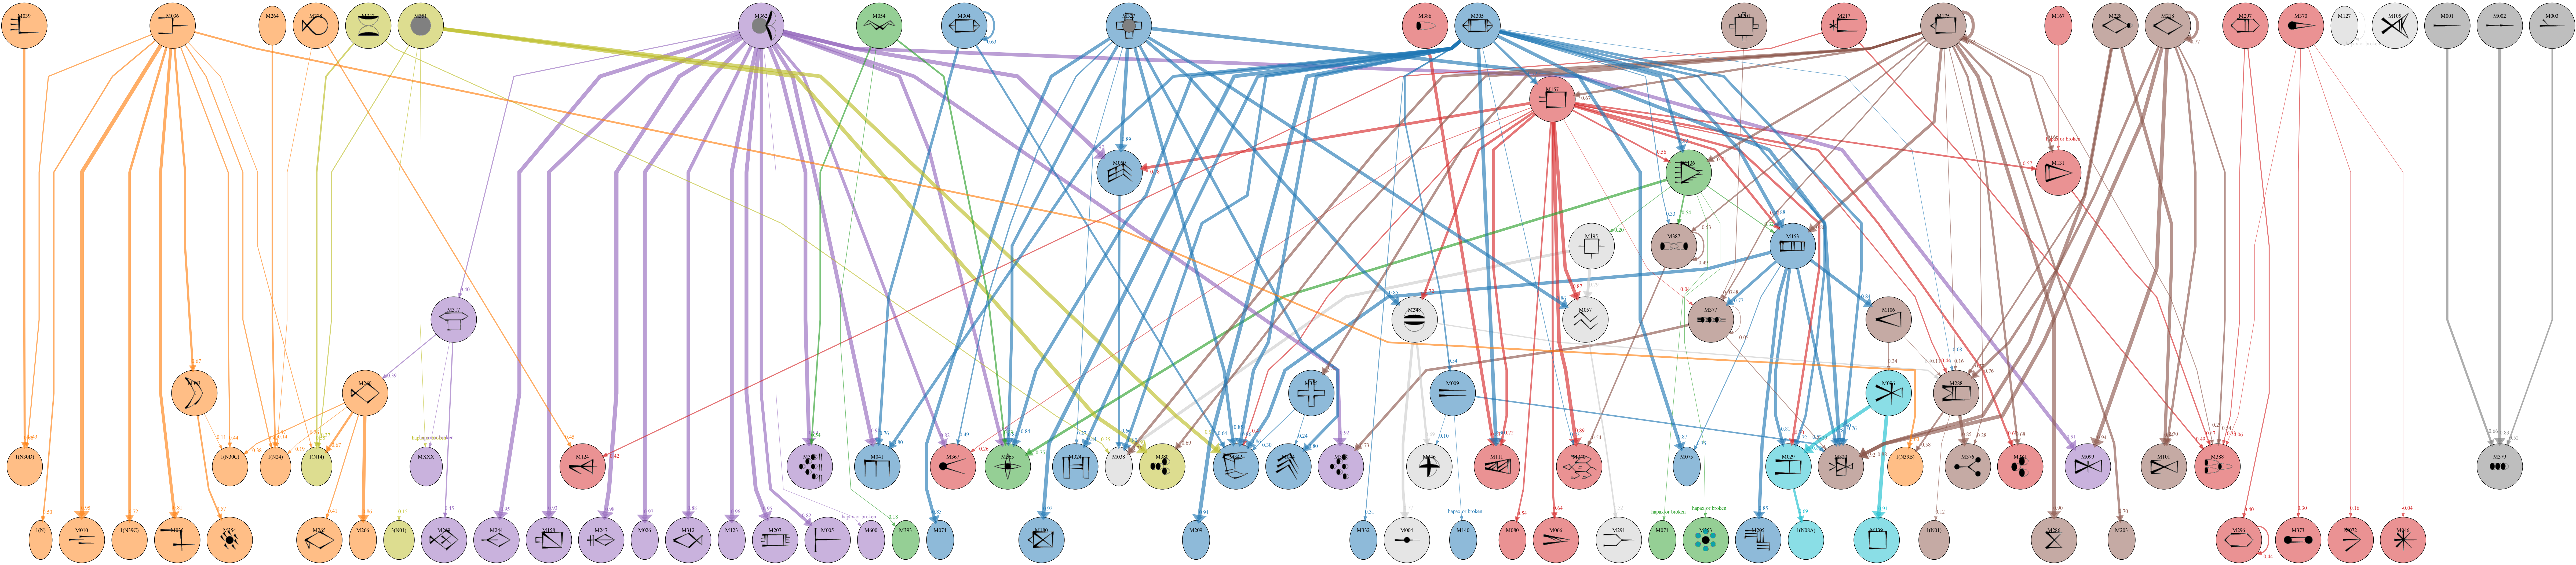

Supplement: OptionalSupplementaryMaterial [file 2021.findings-acl.362.OptionalSupplementaryMaterial.zip]
